# Supplementary material for: Reconstructing Younger Dryas ground temperature and snow thickness from cave deposits
Source: Copernicus journal article supplement (doi:10.5194/cp-20-1521-2024), 2024-07-22
Supplement: Supplementary file 1 [file cp-20-1521-2024-supplement.pdf]

Supplement of *Clim. Past*, 20, 1521–1535, 2024  
<https://doi.org/10.5194/cp-20-1521-2024-supplement>  
© Author(s) 2024. CC BY 4.0 License.

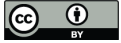

*Supplement of*

## **Reconstructing Younger Dryas ground temperature and snow thickness from cave deposits**

**Paul Töchterle et al.**

*Correspondence to:* Gina E. Moseley ([gina.moseley@uibk.ac.at](mailto:gina.moseley@uibk.ac.at))

The copyright of individual parts of the supplement might differ from the article licence.

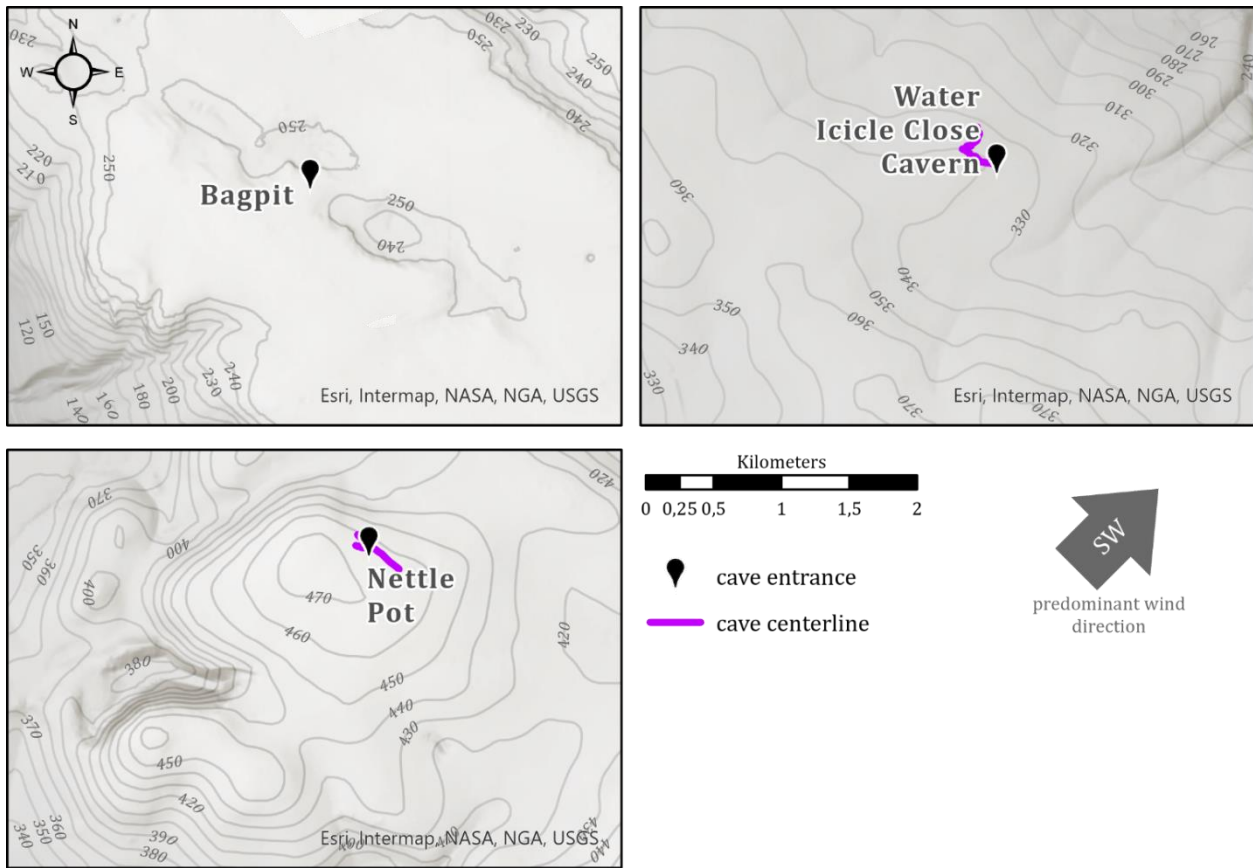

15 **Fig. S1: Topographical maps (scale 1:50 000) of the three cave sites with 10 m contour lines. The locations of cave entrances is marked by a black pin symbol. Centerlines of the cave passages are shown in purple. The caves are located leeward of the predominant south-westerly wind direction as inferred from modern re-analysis data (ERA5 monthly from 1990 to 2020, 54).**

A) Water Icicle Close Cavern (WIC)

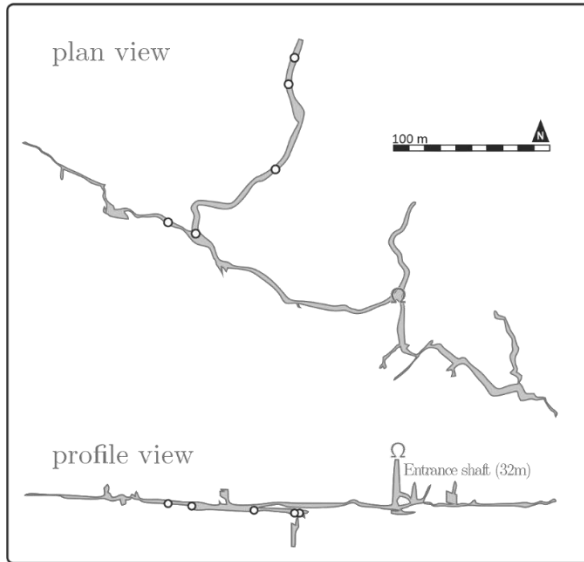

B) Bagpit (BGP)

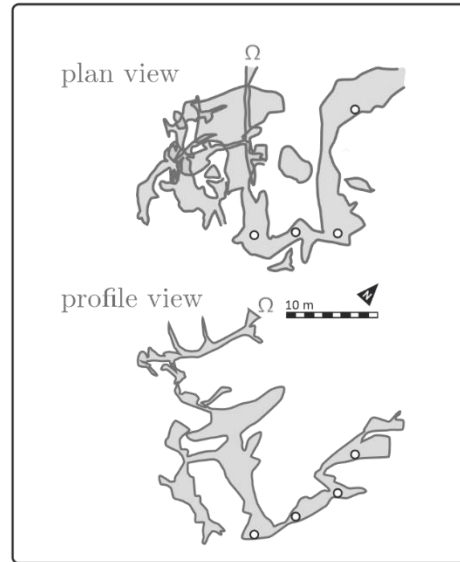

C) Nettle Pot (NTL)

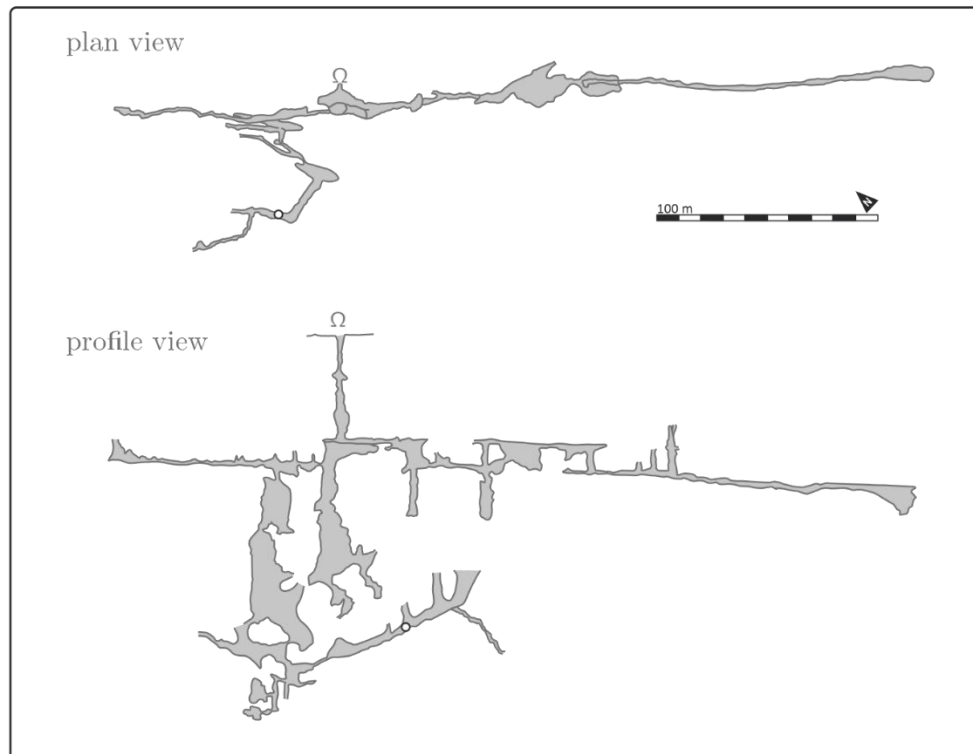

○ sampled CCCs

20 Fig. S2: Cave maps of (A) Water Icicle Close Cavern, (B) Bagpit and (C) Nettle Pot. Locations of the sampled CCC sites are marked by white dots.

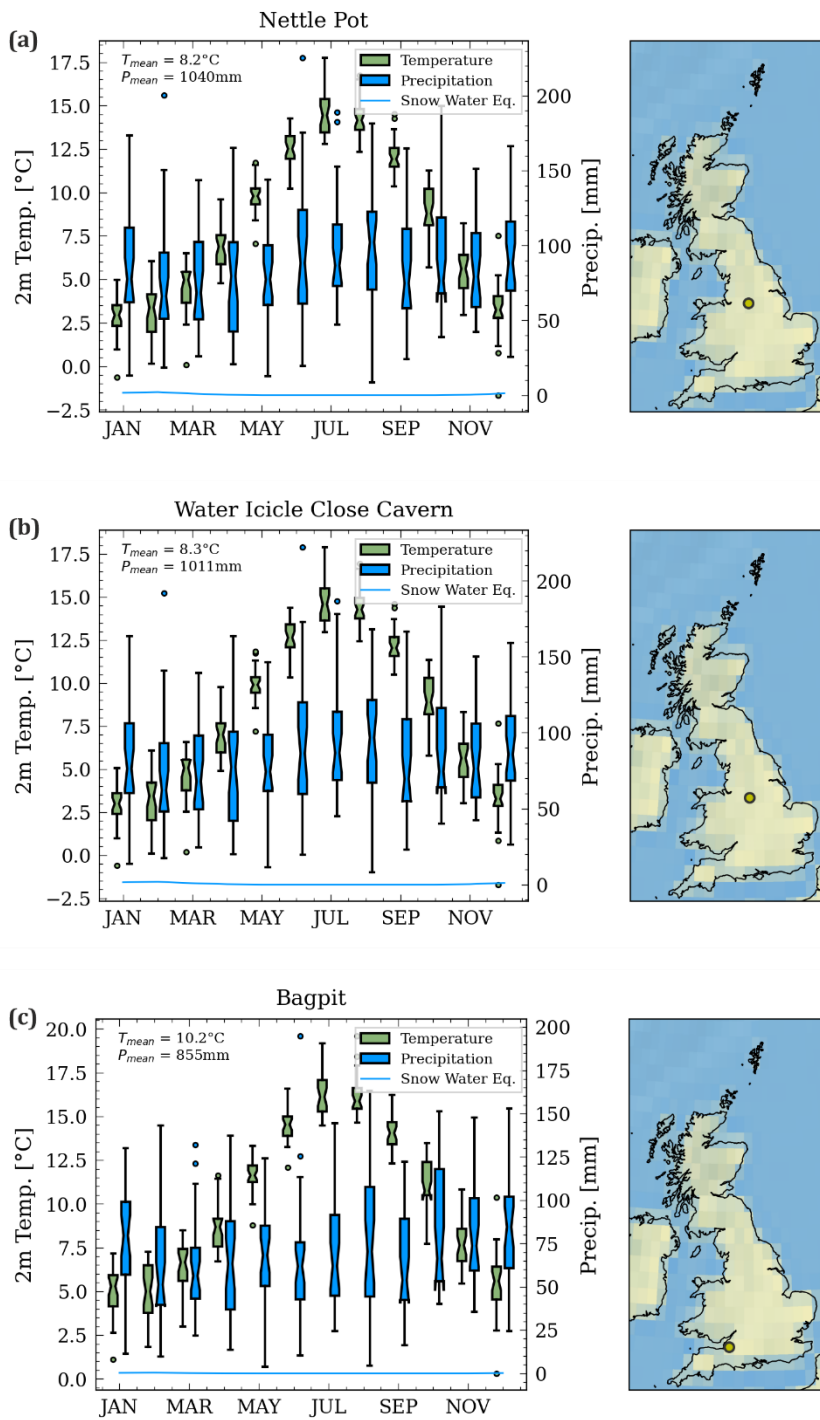

**Fig. S3: Climate diagrams for the three studied cave sites based on reanalysis data between 1990 and 2020 (ERA5 monthly, Muñoz-Sabater, 2019).**

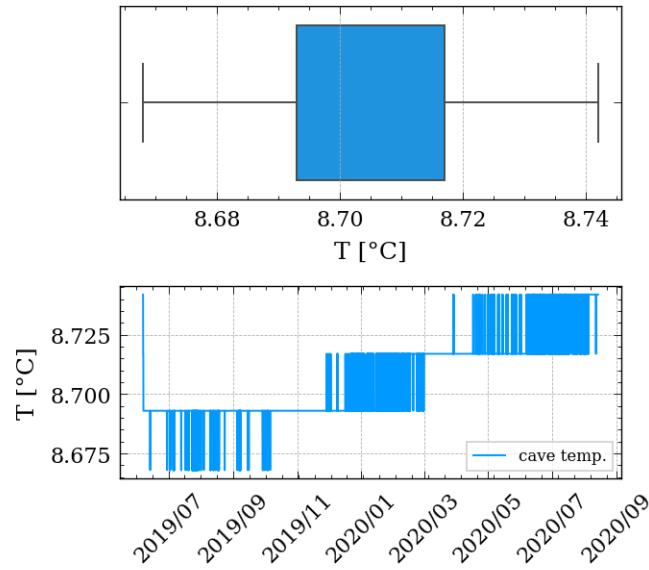

25

**Fig. S4:** Cave air temperature monitoring of Water Icicle Close Cavern. The lower panel shows the time series of temperature over the monitoring period. The increase in temperature is likely the result of instrument drift. The upper panel shows a boxplot of the same dataset.

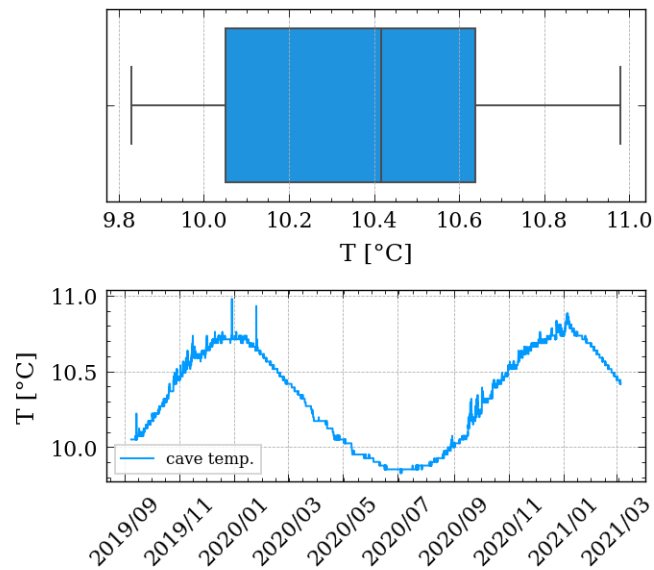

30

**Fig. S5:** Cave air temperature monitoring of Bagpit. The lower panel shows the time series of temperature over the monitoring period. The cave temperature follows a seasonal cycle with that is attenuated and offset by approx. six months from the outside atmospheric cycle. Small positive excursions on the rising limb of the curve are likely caused by advective heat flux from percolating drip water. The upper panel shows a boxplot of the same dataset.

single grains

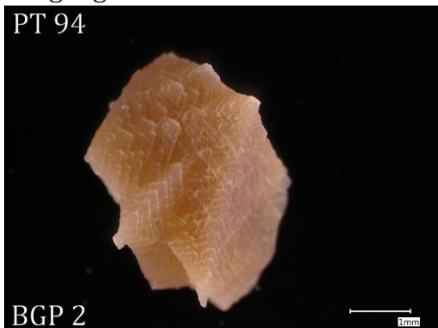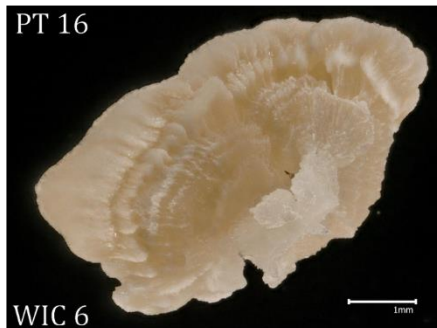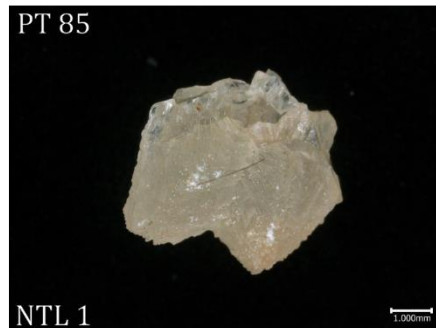

aggregates

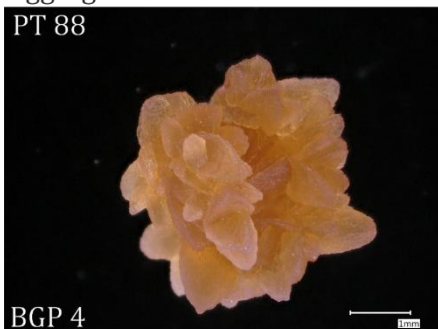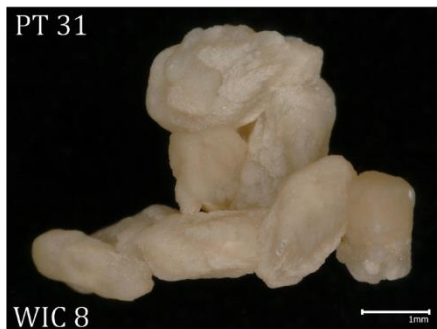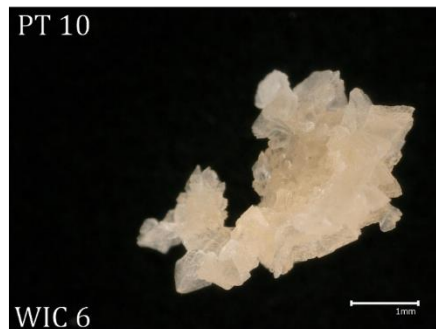

multigrain aliquots

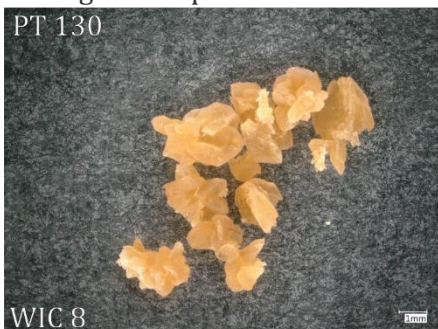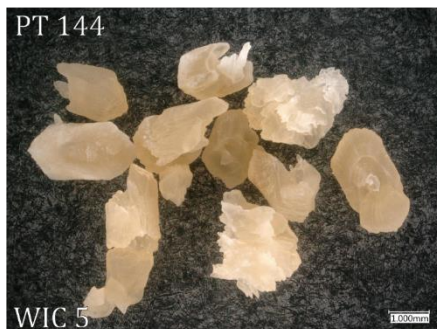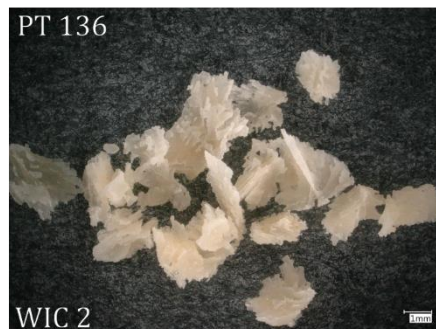

35 Fig. S6: Microscopic images of selected CCC samples. The sample codes refer to the respective lab and sample IDs in table 1, table S1 and the main text.

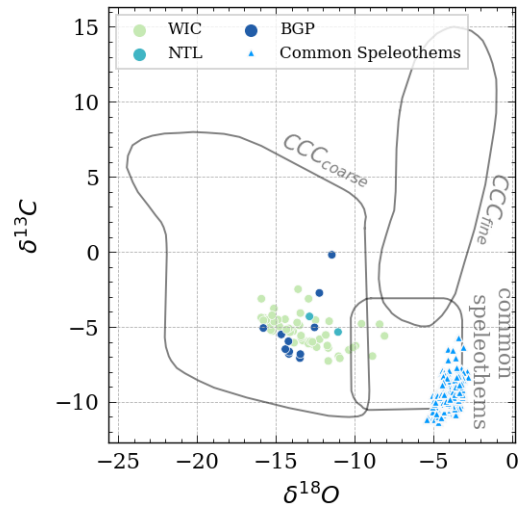

40 **Fig. S7:** Stable C and O isotope data for CCC samples analysed in this study (circles) and common speleothems from Water Ice Close Cavern (triangles) (Gunn et al., 2020) in comparison to Central European reference values (grey outlines) in (Žák et al., 2018). The CCC samples analysed in this study broadly fall within the range of the reference values, albeit with  $\delta^{18}O$  values at the higher end and  $\delta^{13}C$  values at the lower end. Less negative  $\delta^{18}O$  can be explained by the fact that the study area is situated closer to the moisture source than the reference data.

| Isochron | Lab ID | $^{238}\text{U}$<br>[ng g <sup>-1</sup> ] | $^{232}\text{Th}$<br>[pg g <sup>-1</sup> ] | $(^{230}\text{Th}/^{232}\text{Th})$<br>[atomic *10 <sup>-6</sup> ] | $\delta^{234}\text{U}^*$ | $(^{230}\text{Th}/^{238}\text{U})$<br>[activity *10 <sup>-3</sup> ] |
|----------|--------|-------------------------------------------|--------------------------------------------|--------------------------------------------------------------------|--------------------------|---------------------------------------------------------------------|
| BGP1     | PT96   | 2199 ± 6                                  | 156567 ± 3168                              | 41 ± 1                                                             | 362.9 ± 3.1              | 175.1 ± 0.8                                                         |
|          | PT129  | 2343 ± 3                                  | 41225 ± 826                                | 150 ± 3                                                            | 364.3 ± 1.7              | 160.2 ± 0.4                                                         |
|          | PT97   | 2238 ± 4                                  | 36920 ± 741                                | 161 ± 3                                                            | 365.7 ± 1.9              | 160.8 ± 0.5                                                         |
|          | PT95   | 2264 ± 6                                  | 35111 ± 710                                | 170 ± 3                                                            | 364.2 ± 3.1              | 159.6 ± 0.6                                                         |
|          | PT117  | 2324 ± 4                                  | 16695 ± 335                                | 357 ± 7                                                            | 363.2 ± 2.0              | 155.7 ± 0.6                                                         |
|          | PT118  | 2264 ± 3                                  | 12912 ± 259                                | 449 ± 9                                                            | 362.9 ± 1.8              | 155.3 ± 0.5                                                         |
|          | PT130  | 2293 ± 2                                  | 44394 ± 889                                | 137 ± 3                                                            | 360.1 ± 1.4              | 161.0 ± 0.3                                                         |
| BGP2     | PT54   | 1643 ± 1                                  | 10334 ± 207                                | 368 ± 7                                                            | 253.2 ± 1.6              | 140.5 ± 0.4                                                         |
|          | PT120  | 1693 ± 2                                  | 25024 ± 501                                | 158 ± 3                                                            | 252.6 ± 1.6              | 141.9 ± 0.3                                                         |
|          | PT121  | 1652 ± 2                                  | 17019 ± 341                                | 227 ± 5                                                            | 254.7 ± 1.6              | 141.9 ± 0.6                                                         |
|          | PT119  | 1618 ± 2                                  | 14790 ± 296                                | 255 ± 5                                                            | 251.9 ± 1.6              | 141.4 ± 0.6                                                         |
|          | PT94   | 1898 ± 2                                  | 5894 ± 118                                 | 749 ± 15                                                           | 252.1 ± 1.6              | 141.2 ± 0.3                                                         |
|          | PT122  | 1508 ± 2                                  | 18375 ± 368                                | 192 ± 4                                                            | 251.4 ± 1.7              | 141.6 ± 0.3                                                         |
|          | PT123  | 1823 ± 2                                  | 10804 ± 217                                | 389 ± 8                                                            | 253.6 ± 1.6              | 139.7 ± 0.6                                                         |
| BGP3     | PT113  | 2117 ± 3                                  | 49180 ± 986                                | 112 ± 2                                                            | 237.1 ± 1.6              | 158.1 ± 0.3                                                         |
|          | PT114  | 2158 ± 3                                  | 32236 ± 646                                | 169 ± 3                                                            | 240.9 ± 1.6              | 153.3 ± 0.3                                                         |
|          | PT92   | 2081 ± 3                                  | 23092 ± 463                                | 221 ± 4                                                            | 241.0 ± 1.8              | 149.0 ± 0.5                                                         |
| BGP4     | PT87   | 2440 ± 4                                  | 60564 ± 1214                               | 111 ± 2                                                            | 491.1 ± 1.9              | 167.5 ± 0.5                                                         |
|          | PT127  | 2389 ± 4                                  | 20264 ± 407                                | 312 ± 6                                                            | 475.3 ± 3.0              | 160.4 ± 0.8                                                         |
|          | PT88   | 2196 ± 4                                  | 15839 ± 318                                | 365 ± 7                                                            | 458.4 ± 2.2              | 159.5 ± 0.4                                                         |
|          | PT128  | 2374 ± 2                                  | 9844 ± 198                                 | 627 ± 13                                                           | 456.3 ± 1.7              | 157.6 ± 0.4                                                         |
| NTL1     | PT86   | 5125 ± 13                                 | 36963 ± 745                                | 485 ± 10                                                           | 952.5 ± 2.2              | 211.9 ± 0.6                                                         |
|          | PT134  | 5652 ± 10                                 | 21791 ± 437                                | 892 ± 18                                                           | 962.8 ± 2.5              | 208.5 ± 0.5                                                         |
|          | PT133  | 5147 ± 12                                 | 19672 ± 396                                | 894 ± 18                                                           | 960.0 ± 3.4              | 207.2 ± 0.7                                                         |
|          | PT85   | 5049 ± 9                                  | 11083 ± 223                                | 1545 ± 31                                                          | 957.7 ± 1.8              | 205.6 ± 0.5                                                         |
|          | PT132  | 5773 ± 7                                  | 11547 ± 232                                | 1683 ± 34                                                          | 964.0 ± 2.0              | 204.2 ± 0.5                                                         |
| WIC2     | PT65   | 1479 ± 1                                  | 4742 ± 95                                  | 914 ± 19                                                           | 551.2 ± 1.9              | 177.7 ± 0.5                                                         |
|          | PT136  | 1575 ± 2                                  | 20416 ± 409                                | 248 ± 5                                                            | 539.8 ± 1.8              | 194.7 ± 0.4                                                         |
|          | PT135  | 1484 ± 2                                  | 15116 ± 303                                | 309 ± 6                                                            | 542.7 ± 1.7              | 190.8 ± 0.5                                                         |
| WIC5     | PT84   | 1499 ± 2                                  | 6499 ± 130                                 | 628 ± 13                                                           | 549.2 ± 2.1              | 165.1 ± 0.3                                                         |
|          | PT143  | 1120 ± 1                                  | 6559 ± 131                                 | 472 ± 10                                                           | 557.4 ± 2.1              | 167.6 ± 0.4                                                         |
|          | PT144  | 1360 ± 2                                  | 7633 ± 153                                 | 491 ± 10                                                           | 536.8 ± 1.9              | 167.2 ± 0.5                                                         |
| WIC6     | PT10   | 3340 ± 5                                  | 19264 ± 387                                | 630 ± 13                                                           | 1034.4 ± 1.9             | 220.5 ± 0.6                                                         |
|          | PT11   | 3147 ± 4                                  | 10802 ± 217                                | 1042 ± 21                                                          | 1038.0 ± 2.0             | 216.9 ± 0.4                                                         |
|          | PT09   | 3010 ± 4                                  | 6218 ± 125                                 | 1706 ± 34                                                          | 1038.9 ± 2.2             | 213.7 ± 0.4                                                         |
|          | PT17   | 1758 ± 2                                  | 1884 ± 38                                  | 3215 ± 65                                                          | 1042.3 ± 1.6             | 209.0 ± 0.3                                                         |
|          | PT16   | 1703 ± 2                                  | 1074 ± 22                                  | 5459 ± 110                                                         | 1041.5 ± 2.3             | 208.9 ± 0.3                                                         |
|          | PT15   | 1707 ± 2                                  | 981 ± 20                                   | 5994 ± 121                                                         | 1039.3 ± 2.7             | 209.0 ± 0.4                                                         |
| WIC8     | PT34   | 1087 ± 1                                  | 54301 ± 1088                               | 69 ± 1                                                             | 487.8 ± 2.0              | 210.0 ± 0.4                                                         |
|          | PT32   | 1072 ± 2                                  | 52299 ± 1049                               | 72 ± 1                                                             | 490.9 ± 2.4              | 211.7 ± 0.8                                                         |
|          | PT35   | 1198 ± 2                                  | 36337 ± 730                                | 104 ± 2                                                            | 488.0 ± 3.0              | 191.7 ± 0.7                                                         |
|          | PT31   | 1092 ± 1                                  | 30804 ± 617                                | 108 ± 2                                                            | 492.7 ± 1.9              | 185.3 ± 0.4                                                         |
|          | PT30   | 1035 ± 1                                  | 25456 ± 510                                | 122 ± 2                                                            | 491.6 ± 1.7              | 182.3 ± 0.6                                                         |
|          | PT29   | 1680 ± 3                                  | 6514 ± 131                                 | 675 ± 14                                                           | 492.8 ± 2.5              | 158.9 ± 0.4                                                         |
|          | PT28   | 1487 ± 1                                  | 5510 ± 110                                 | 718 ± 14                                                           | 488.7 ± 1.5              | 161.4 ± 0.2                                                         |
|          | PT27   | 1466 ± 1                                  | 4733 ± 95                                  | 808 ± 16                                                           | 489.6 ± 2.0              | 158.3 ± 0.3                                                         |
| WIC9     | PT07   | 1640 ± 2                                  | 5183 ± 104                                 | 866 ± 18                                                           | 492.4 ± 1.6              | 166.1 ± 0.5                                                         |
|          | PT08   | 1574 ± 1                                  | 3066 ± 61                                  | 1372 ± 28                                                          | 491.4 ± 1.8              | 162.1 ± 0.3                                                         |
|          | PT140  | 1518 ± 2                                  | 35630 ± 714                                | 135 ± 3                                                            | 485.7 ± 1.9              | 192.9 ± 0.5                                                         |
|          | PT141  | 1564 ± 2                                  | 27773 ± 557                                | 169 ± 3                                                            | 484.5 ± 1.9              | 181.7 ± 0.4                                                         |
|          | PT139  | 1634 ± 2                                  | 20501 ± 411                                | 237 ± 5                                                            | 486.3 ± 1.7              | 180.4 ± 0.4                                                         |

**Table S1: Results of individual U/Th analyses on 51 aliquots of CCC samples from the three studied caves. The first column denotes the identifier of the respective CCC occurrence and isochron in table 1 of the main text. Uncertainties are reported at a 2 $\sigma$  level.**



## 45 Isochrons

The following plots show the 3D  $^{230}\text{Th}/\text{U}$  isochrons for each of the presented CCC deposits, based on the individual analyses from table S1. Depicted are the projections in the  $^{232}\text{Th}/^{238}\text{U}$  vs.  $^{234}\text{U}/^{238}\text{U}$  and  $^{232}\text{Th}/^{238}\text{U}$  vs.  $^{230}\text{Th}/^{238}\text{U}$  planes (Ludwig and Titterton, 1994). The least-squares linear regression (blue line) of the depicted dataset is shown with the 95 % confidence interval (shaded area) of the regression based on a bootstrap ( $n=1000$ ). Regression metrics are provided in table 1 of the main

50 text.

### BGP 1

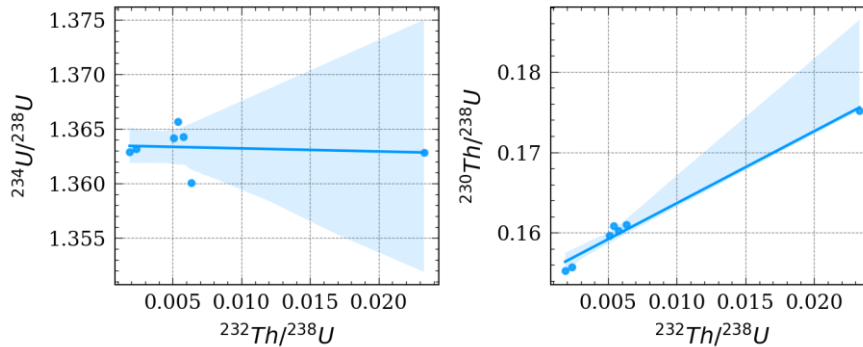

### BGP 2

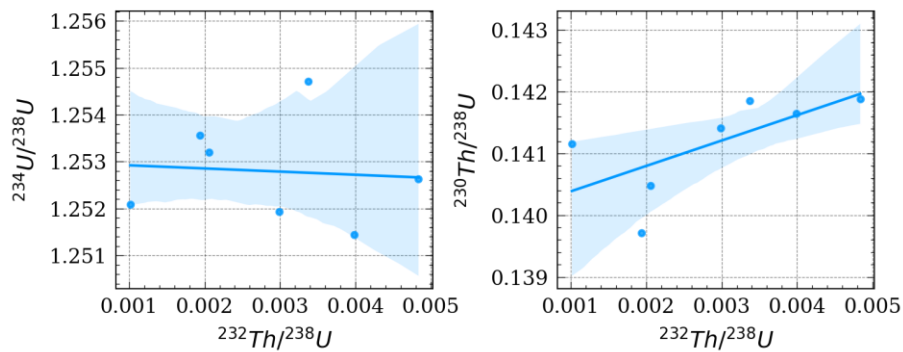

### BGP 3

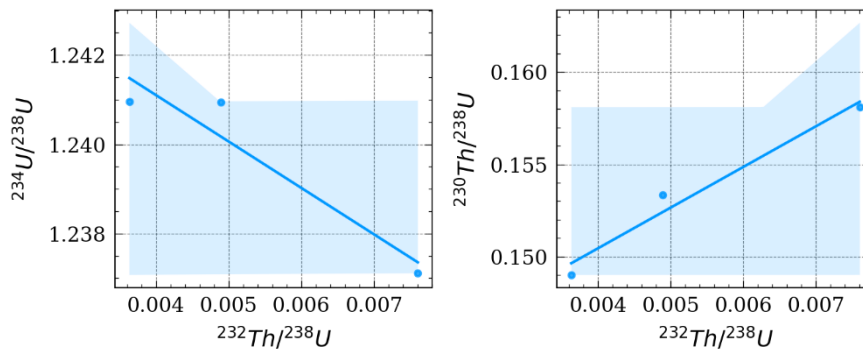

BGP 4

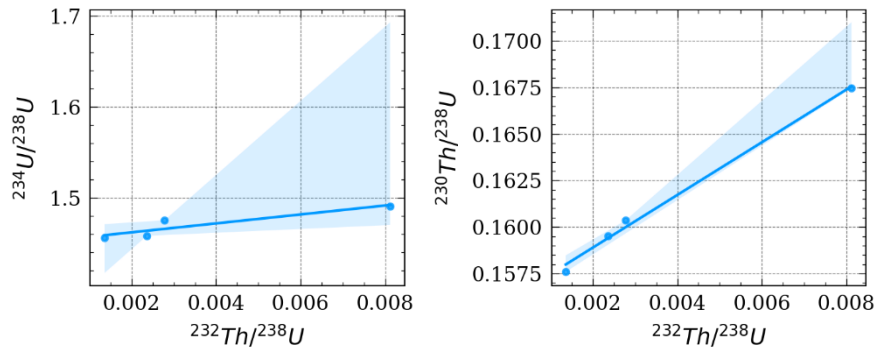

NTL 1

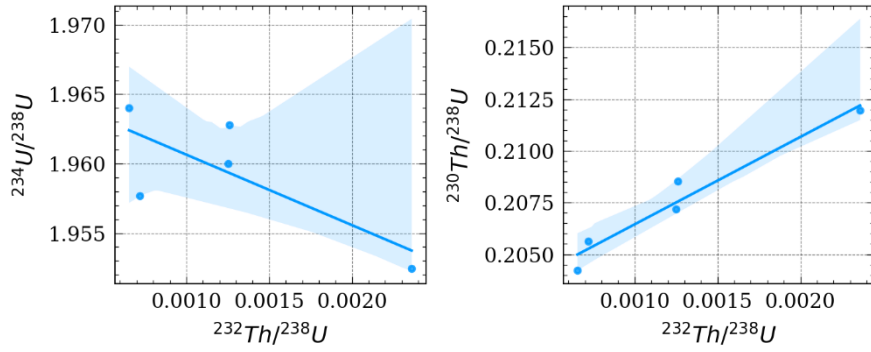

WIC 2

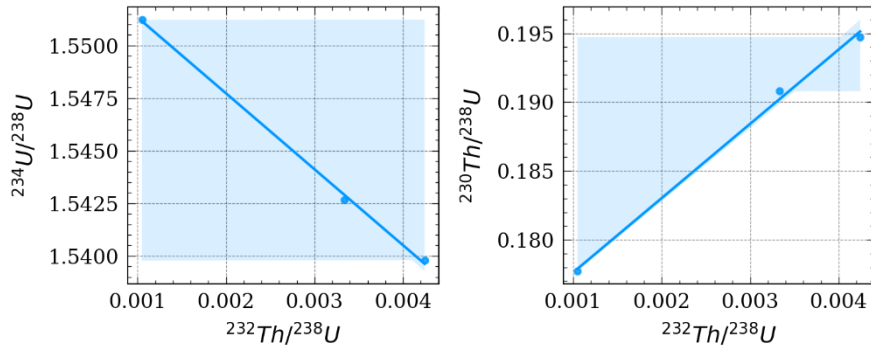

WIC 5

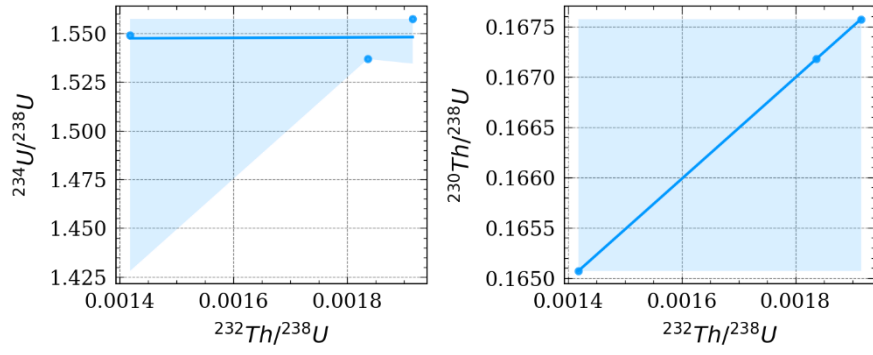

WIC 6

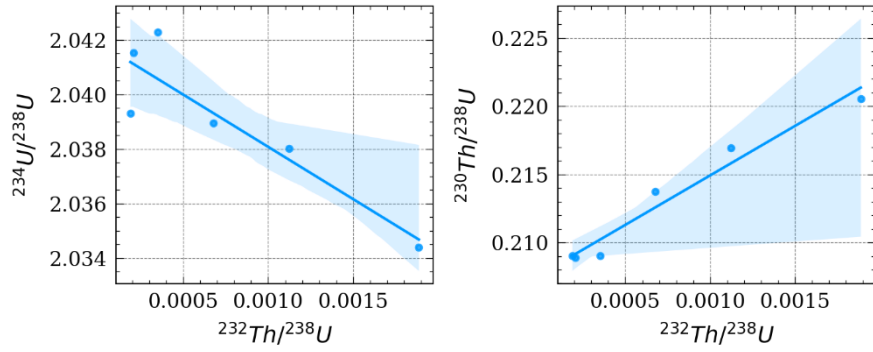

## WIC 8

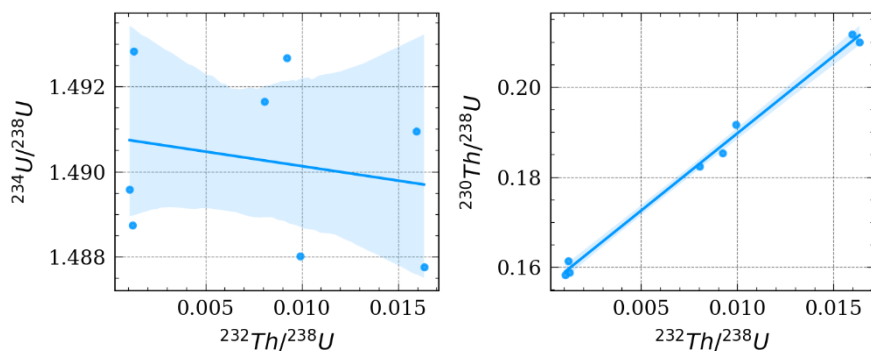

## WIC 9

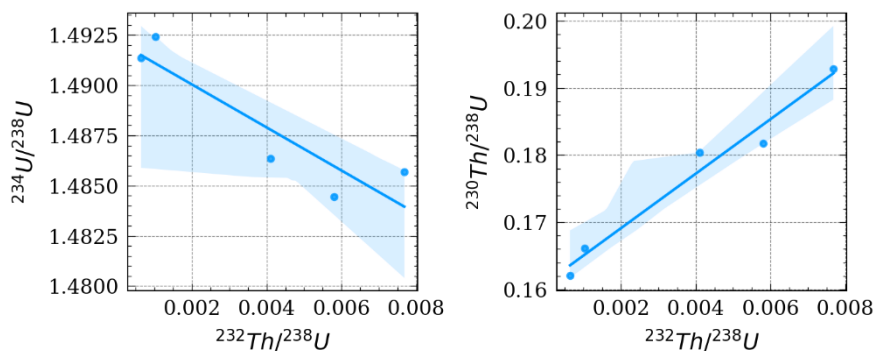

60

## References

Gunn, J., Fairchild, I. J., Moseley, G. E., Töchterle, P., Ashley, K. E., Hellstrom, J., and Edwards, R. L.: Palaeoenvironments in the central White Peak District (Derbyshire, UK): evidence from Water Icicle Close Cavern, *Cave Karst Sci.*, 47, 153–168, 2020.

65 Ludwig, K. R. and Titterton, D. M.: Calculation of  $^{230}\text{Th}/\text{U}$  isochrons, ages, and errors, *Geochim. Cosmochim. Ac.*, 58, 5031–5042, [https://doi.org/10.1016/0016-7037\(94\)90229-1](https://doi.org/10.1016/0016-7037(94)90229-1), 1994.

Muñoz-Sabater, J.: ERA5-Land monthly averaged data from 1981 to present, 2019.

Žák, K., Onac, B. P., Kadebskaya, O., Filippi, M., Dublyansky, Y., and Luetscher, M.: Cryogenic Mineral Formation in Caves, in: *Ice caves*, edited by: Perşoiu, A. and Lauritzen, S.-E., Elsevier, Amsterdam, Oxford, Cambridge, Mass., 2018.
